# Supplementary material for: Vinyl and carbene ruthenium(ii) complexes from hydridoruthenium(ii) precursors
Source: Royal Society of Chemistry journal article supplement (doi:10.1039/b314425a), 2004-01-01
Supplement: b314425a.pdf [file b314425a.pdf]

**Supplementary material:** Complete list of  $^1\text{H}$  and  $^{13}\text{C}$  NMR data for compounds **5-24**, **26**, **27**, **30** and **31**.

Compound **5**: NMR ( $\text{CD}_2\text{Cl}_2$ ):  $\delta_{\text{H}}$  (400 MHz) 6.93 [1 H, d,  $J(\text{H,H})$  12.6, RuCH], 4.75 [1 H, dt,  $J(\text{H,H})$  12.6,  $J(\text{P,H})$  2.3, =CHtBu], 2.73 [6 H, m; in  $^1\text{H}\{^{31}\text{P}\}$  sept,  $J(\text{H,H})$  7.2, PCHCH<sub>3</sub>], 1.28, 1.26 [18 H each, both dvt,  $N$  14.4,  $J(\text{H,H})$  7.2, PCHCH<sub>3</sub>], 0.88 (9 H, s, CCH<sub>3</sub>);  $\delta_{\text{C}}$  (100.6 MHz) 203.4 [t,  $J(\text{P,C})$  13.4, CO], 143.7 [t,  $J(\text{P,C})$  3.8, RuC=C], 132.8 [t,  $J(\text{P,C})$  10.5, RuCH], 35.7 (s, CCH<sub>3</sub>), 29.9 (s, CCH<sub>3</sub>), 24.1 (vt,  $N$  19.1, PCHCH<sub>3</sub>), 19.7 (s, PCHCH<sub>3</sub>).

Compound **6**: NMR ( $\text{CD}_2\text{Cl}_2$ ):  $\delta_{\text{H}}$  (400 MHz) 7.63 [1 H, dd,  $J(\text{H,H})$  14.2,  $J(\text{H,H})$  6.3, RuCH], 4.83 (1 H, m, one H of =CH<sub>2</sub> *cis* to RuCH), 4.55 [1 H, br d,  $J(\text{H,H})$  14.2, one H of =CH<sub>2</sub> *trans* to RuCH], 2.41-1.09 (66 H, br m, C<sub>6</sub>H<sub>11</sub>);  $\delta_{\text{C}}$  (100.6 MHz) 203.3 [t,  $J(\text{P,C})$  12.7, CO], 152.8 [t,  $J(\text{P,C})$  10.2, RuCH], 119.1 [t,  $J(\text{P,C})$  3.2, RuC=C], 34.7 (vt,  $N$  19.1, C1 of C<sub>6</sub>H<sub>11</sub>), 30.2, 29.9 (both s, C3,5 of C<sub>6</sub>H<sub>11</sub>), 28.1, 27.9 (both vt,  $N$  10.2, C2,6 of C<sub>6</sub>H<sub>11</sub>), 26.8 (s, C4 of C<sub>6</sub>H<sub>11</sub>).

Compound **7**: NMR ( $\text{CD}_2\text{Cl}_2$ ):  $\delta_{\text{H}}$  (400 MHz) 8.55 [1 H, d,  $J(\text{H,H})$  13.5, RuCH], 7.04 (5 H, m, C<sub>6</sub>H<sub>5</sub>), 5.92 [1 H, d,  $J(\text{H,H})$  13.5, =CHPh], 2.52-1.14 (66 H, br m, C<sub>6</sub>H<sub>11</sub>);  $\delta_{\text{C}}$  (100.6 MHz) 202.9 [t,  $J(\text{P,C})$  12.7, CO], 151.2 [t,  $J(\text{P,C})$  10.7, RuCH], 139.1 (s, *ipso*-C of C<sub>6</sub>H<sub>5</sub>), 133.3 [t,  $J(\text{P,C})$  3.6, RuC=C], 128.2, 123.8, 123.5 (all s, C<sub>6</sub>H<sub>5</sub>), 34.6 (vt,  $N$  18.3, C1 of C<sub>6</sub>H<sub>11</sub>), 30.1, 29.7 (both s, C3,5 of C<sub>6</sub>H<sub>11</sub>), 27.9, 27.8 (both vt,  $N$  10.2, C2,6 of C<sub>6</sub>H<sub>11</sub>), 26.6 (s, C4 of C<sub>6</sub>H<sub>11</sub>).

Compound **8**: NMR ( $\text{CD}_2\text{Cl}_2$ ):  $\delta_{\text{H}}$  (400 MHz) 6.92 [1 H, d,  $J(\text{H,H})$  12.8, RuCH], 4.66 [1 H, d,  $J(\text{H,H})$  12.8, =CHtBu], 2.43-1.14 (66 H, br m, C<sub>6</sub>H<sub>11</sub>), 0.80 (9 H, s, CCH<sub>3</sub>);  $\delta_{\text{C}}$  (100.6 MHz)

203.2 [t,  $J(\text{P,C})$  13.4, CO], 142.8 [t,  $J(\text{P,C})$  3.8, RuC=C], 132.5 [t,  $J(\text{P,C})$  10.5, RuCH], 35.6 (s, CCH<sub>3</sub>), 34.2 (vt,  $N$  18.1, C1 of C<sub>6</sub>H<sub>11</sub>), 30.0 (s, CCH<sub>3</sub>), 29.9, 29.5 (both s, C3,5 of C<sub>6</sub>H<sub>11</sub>), 27.8, 27.6 (both vt,  $N$  10.5, C2,6 of C<sub>6</sub>H<sub>11</sub>), 26.5 (s, C4 of C<sub>6</sub>H<sub>11</sub>).

Compound **9**: NMR (CD<sub>2</sub>Cl<sub>2</sub>):  $\delta_{\text{H}}$  (200 MHz) 16.82 [1 H, q,  $J(\text{H,H})$  4.9, Ru=CH], 3.05 (3 H, m, CH<sub>3</sub>), 2.78 (6 H, m, PCHCH<sub>3</sub>), 1.30 (36 H, m, PCHCH<sub>3</sub>);  $\delta_{\text{C}}$  (50.3 MHz, 253 K) 328.9 (br s, Ru=CH), 195.0 (br s, CO), 50.4 (s, CH<sub>3</sub>), 25.2 (vt,  $N$  22.8, PCHCH<sub>3</sub>), 19.3, 18.5 (both s, PCHCH<sub>3</sub>).

Compound **10**: NMR (CD<sub>2</sub>Cl<sub>2</sub>):  $\delta_{\text{H}}$  (200 MHz, 253 K) 16.95 [1 H, q,  $J(\text{H,H})$  5.4, Ru=CH], 7.35 (5 H, m, C<sub>6</sub>H<sub>5</sub>), 4.36 (2 H, m, CH<sub>2</sub>Ph), 2.76 (6 H, m, PCHCH<sub>3</sub>), 1.24 (36 H, m, PCHCH<sub>3</sub>);  $\delta_{\text{C}}$  (50.3 MHz, 253 K) 328.4 (br s, Ru=CH), 194.8 [t,  $J(\text{P,C})$  10.2, CO], 133.7 (s, *ipso*-C of C<sub>6</sub>H<sub>5</sub>), 129.2, 128.2, 127.8 (all s, C<sub>6</sub>H<sub>5</sub>), 65.6 (s, CH<sub>2</sub>Ph), 25.2 (vt,  $N$  22.9, PCHCH<sub>3</sub>), 19.4, 18.7 (both s, PCHCH<sub>3</sub>).

Compound **11**: NMR (CD<sub>2</sub>Cl<sub>2</sub>):  $\delta_{\text{H}}$  (400 MHz) 17.40 (1 H, br s, Ru=CH), 2.97 [2 H, m; in <sup>1</sup>H{<sup>31</sup>P} d,  $J(\text{H,H})$  3.9, CH<sub>2</sub>*t*Bu], 2.83 [6 H, m; in <sup>1</sup>H{<sup>31</sup>P} sept,  $J(\text{H,H})$  7.0, PCHCH<sub>3</sub>], 1.33, 1.32 [18 H each, both dvt,  $N$  14.9,  $J(\text{H,H})$  7.0, PCHCH<sub>3</sub>], 1.03 (9 H, s, CCH<sub>3</sub>);  $\delta_{\text{C}}$  (100.6 MHz) 333.3 (br s, Ru=CH), 195.0 [t,  $J(\text{P,C})$  10.8, CO], 72.2 (s, CH<sub>2</sub>*t*Bu), 33.7 (s, CCH<sub>3</sub>), 29.2 (s, CCH<sub>3</sub>), 25.5 (vt,  $N$  22.9, PCHCH<sub>3</sub>), 19.9, 19.0 (both s, PCHCH<sub>3</sub>).

Compound **12**: NMR (CD<sub>2</sub>Cl<sub>2</sub>):  $\delta_{\text{H}}$  (200 MHz, 253 K) 16.82 [1 H, q,  $J(\text{H,H})$  4.9, Ru=CH], 2.96 (3 H, m, CH<sub>3</sub>), 2.50-1.15 (66 H, br m, C<sub>6</sub>H<sub>11</sub>);  $\delta_{\text{C}}$  (50.3 MHz, 253 K) 326.3 (br s, Ru=CH), 195.1 [t,  $J(\text{P,C})$  10.2, CO], 50.0 (s, CH<sub>3</sub>), 34.1 (vt,  $N$  22.5, C1 of C<sub>6</sub>H<sub>11</sub>), 29.5, 28.5 (both s, C3,5 of C<sub>6</sub>H<sub>11</sub>), 26.9, 26.8 (both vt,  $N$  10.2, C2,6 of C<sub>6</sub>H<sub>11</sub>), 25.3 (s, C4 of C<sub>6</sub>H<sub>11</sub>).

Compound **13**: NMR (CD<sub>2</sub>Cl<sub>2</sub>): δ<sub>H</sub> (200 MHz, 253 K) 16.92 (1 H, br s, Ru=CH), 7.30 (5 H, m, C<sub>6</sub>H<sub>5</sub>), 4.33 (2 H, m, CH<sub>2</sub>Ph), 2.52-1.28 (66 H, br m, C<sub>6</sub>H<sub>11</sub>).

Compound **14**: NMR (CD<sub>2</sub>Cl<sub>2</sub>): δ<sub>H</sub> (200 MHz) 17.13 (1 H, br s, Ru=CH), 2.80 (2 H, br s, CH<sub>2</sub>*t*Bu), 2.47-1.16 (66 H, br m, C<sub>6</sub>H<sub>11</sub>), 0.98 (9 H, s, CCH<sub>3</sub>); δ<sub>C</sub> (50.3 MHz) 329.0 (br s, Ru=CH), 194.9 [t, *J*(P,C) 10.2, CO], 70.9 (s, CH<sub>2</sub>*t*Bu), 34.4 (vt, *N* 21.6, C1 of C<sub>6</sub>H<sub>11</sub>), 33.3 (s, CCH<sub>3</sub>), 29.8, 28.8 (both s, C3,5 of C<sub>6</sub>H<sub>11</sub>), 28.9 (s, CCH<sub>3</sub>), 27.0, 26.8 (both vt, *N* 10.2, C2,6 of C<sub>6</sub>H<sub>11</sub>), 25.7 (s, C4 of C<sub>6</sub>H<sub>11</sub>).

Compound **15**: NMR (CD<sub>2</sub>Cl<sub>2</sub>): δ<sub>H</sub> (400 MHz) 6.81 [1 H, dd, *J*(P,H) 41.4, *J*(H,H) 13.1, one H of =CH<sub>2</sub> *cis* to PCH], 6.46 [1 H, dd, *J*(P,H) 19.1, *J*(H,H) 19.1, one H of =CH<sub>2</sub> *trans* to PCH], 6.21 [1 H, ddd, *J*(P,H) 13.1, *J*(H,H) 19.1, *J*(H,H) 13.1, PCH], 2.80 [3 H, m; in <sup>1</sup>H{<sup>31</sup>P} d, *J*(H,H) 7.4, PCHCH<sub>3</sub>], 1.40 [18 H, dd, *J*(P,H) 16.3, *J*(H,H) 7.4, PCHCH<sub>3</sub>]; δ<sub>C</sub> (100.6 MHz) 143.5 [d, *J*(P,C) 2.6, =CH<sub>2</sub>], 113.7 [d, *J*(P,C) 70.2, PCH], 20.7 [d, *J*(P,C) 43.2, PCHCH<sub>3</sub>], 16.3 [d, *J*(P,C) 3.8, PCHCH<sub>3</sub>].

Compound **16**: NMR (CD<sub>2</sub>Cl<sub>2</sub>): δ<sub>H</sub> (400 MHz) 6.76 [1 H, dd, *J*(P,H) 41.4, *J*(H,H) 13.0, one H of =CH<sub>2</sub> *cis* to PCH], 6.35 [1 H, dd, *J*(P,H) 18.8, *J*(H,H) 18.8, one H of =CH<sub>2</sub> *trans* to PCH], 6.15 [1 H, ddd, *J*(P,H) 13.0, *J*(H,H) 18.8, *J*(H,H) 13.0, PCH], 2.49-1.25 (33 H, br m C<sub>6</sub>H<sub>11</sub>); δ<sub>C</sub> (100.6 MHz) 142.8 [d, *J*(P,C) 2.0, =CH<sub>2</sub>], 114.0 [d, *J*(P,C) 70.2, PCH], 29.8 [d, *J*(P,C) 41.7, C1 of C<sub>6</sub>H<sub>11</sub>], 27.9 [d, *J*(P,C) 3.1, C3,5 of C<sub>6</sub>H<sub>11</sub>], 26.4 [d, *J*(P,C) 18.3, C2,6 of C<sub>6</sub>H<sub>11</sub>], 25.4 (s, C4 of C<sub>6</sub>H<sub>11</sub>).

Compound **17**: NMR (CD<sub>2</sub>Cl<sub>2</sub>): δ<sub>H</sub> (400 MHz) 2.67 (6 H, m, PCHCH<sub>3</sub>), 2.52, 2.45 (3 H each, both s, CH<sub>3</sub>CN), 1.40 (36 H, m, PCHCH<sub>3</sub>); δ<sub>C</sub> (100.6 MHz) 203.6 [t, *J*(P,C) 13.2, CO], 130.0,

127.6 (both s, CN), 24.2 (vt, *N* 20.3, PCHCH<sub>3</sub>), 19.5, 19.2 (both s, PCHCH<sub>3</sub>), 4.5, 4.2 (both s, CH<sub>3</sub>CN).

Compound **18b**: NMR (CD<sub>2</sub>Cl<sub>2</sub>): δ<sub>H</sub> (400 MHz) 2.33 [6 H, m; in <sup>1</sup>H{<sup>31</sup>P} sept, *J*(H,H) 7.0, PCHCH<sub>3</sub>], 2.30, 2.29 (3 H each, both s, CH<sub>3</sub>CN), 1.30, 1.29 [18 H each, both dvt, *N* 14.1, *J*(H,H) 7.0, PCHCH<sub>3</sub>], -14.19 [1 H, t, *J*(P,H) 18.8, RuH]; δ<sub>C</sub> (100.6 MHz) 203.7 [t, *J*(P,C) 13.4, CO], 126.0, 125.3 (both s, CN), 25.3 (vt, *N* 21.0, PCHCH<sub>3</sub>), 19.0 (s, PCHCH<sub>3</sub>), 3.4, 3.1 (both s, CH<sub>3</sub>CN).

Compound **19**: NMR (C<sub>6</sub>D<sub>6</sub>): δ<sub>H</sub> (400 MHz) 2.23-1.25 (69 H, br m, C<sub>6</sub>H<sub>11</sub> and O<sub>2</sub>CCH<sub>3</sub>), -17.40 [1 H, t, *J*(P,H) 19.7, RuH]; δ<sub>C</sub> (100.6 MHz) 207.8 (br s, CO), 181.7 (s, O<sub>2</sub>CCH<sub>3</sub>), 35.5 (vt, *N* 18.3, C1 of C<sub>6</sub>H<sub>11</sub>), 30.8, 29.8 (both s, C3,5 of C<sub>6</sub>H<sub>11</sub>), 28.5, 28.3 (both vt, *N* 10.2, C2,6 of C<sub>6</sub>H<sub>11</sub>), 27.0 (s, C4 of C<sub>6</sub>H<sub>11</sub>), 24.7 (s, O<sub>2</sub>CCH<sub>3</sub>).

Compound **20**: NMR (C<sub>6</sub>D<sub>6</sub>): δ<sub>H</sub> (200 MHz) 8.46 [1 H, dd, *J*(H,H) 16.5, *J*(H,H) 9.1, RuCH], 5.99 [1 H, dd, *J*(H,H) 9.1, *J*(H,H) 1.8, one H of =CH<sub>2</sub> *cis* to RuCH], 5.47 [1 H, dd, *J*(H,H) 16.5, *J*(H,H) 1.8, one H of =CH<sub>2</sub> *trans* to RuCH], 2.36-1.25 (69 H, br m, C<sub>6</sub>H<sub>11</sub> and O<sub>2</sub>CCH<sub>3</sub>); δ<sub>C</sub> (100.6 MHz) 209.6 [t, *J*(P,C) 14.2, CO], 181.4 (s, O<sub>2</sub>CCH<sub>3</sub>), 164.6 [t, *J*(P,C) 11.2, RuCH], 118.8 (s, RuC=C), 34.9 (vt, *N* 16.3, C1 of C<sub>6</sub>H<sub>11</sub>), 30.0, 29.9 (both s, C3,5 of C<sub>6</sub>H<sub>11</sub>), 28.4, 28.3 (both vt, *N* 10.2, C2,6 of C<sub>6</sub>H<sub>11</sub>), 27.0 (s, C4 of C<sub>6</sub>H<sub>11</sub>), 22.7 (s, O<sub>2</sub>CCH<sub>3</sub>).

Compound **21**: NMR (C<sub>6</sub>D<sub>6</sub>): δ<sub>H</sub> (400 MHz) 9.17 [1 H, d, *J*(H,H) 15.3, RuCH], 7.22 (5 H, m, C<sub>6</sub>H<sub>5</sub>), 6.65 [1 H, d, *J*(H,H) 15.3, =CHPh], 2.40-1.18 (69 H, br m, C<sub>6</sub>H<sub>11</sub> and O<sub>2</sub>CCH<sub>3</sub>); δ<sub>C</sub> (100.6 MHz) 209.5 [t, *J*(P,C) 14.2, CO], 181.7 (s, O<sub>2</sub>CCH<sub>3</sub>), 161.4 [t, *J*(P,C) 11.2, RuCH], 133.6, 130.6, 128.8, 128.3, 124.1, 123.8 (all s, C<sub>6</sub>H<sub>5</sub> and RuC=C), 35.2 (vt, *N* 17.3, C1 of

C<sub>6</sub>H<sub>11</sub>), 30.0, 29.9 (both s, C3,5 of C<sub>6</sub>H<sub>11</sub>), 28.5, 28.4 (both vt, N 10.2, C2,6 of C<sub>6</sub>H<sub>11</sub>), 26.9 (s, C4 of C<sub>6</sub>H<sub>11</sub>), 22.7 (s, O<sub>2</sub>CCH<sub>3</sub>).

Compound **22**: NMR (CD<sub>2</sub>Cl<sub>2</sub>): δ<sub>H</sub> (200 MHz) 17.31 [1 H, q, *J*(H,H) 6.5, Ru=CH], 2.90 [3 H, d, *J*(H,H) 6.5, =CHCH<sub>3</sub>], 2.11-1.26 (69 H, br m, C<sub>6</sub>H<sub>11</sub> and O<sub>2</sub>CCH<sub>3</sub>).

Compound **23**: NMR (C<sub>6</sub>D<sub>6</sub>): δ<sub>H</sub> (400 MHz) 8.24 [1 H, dd, *J*(H,H) 19.6, *J*(H,H) 11.7 RuCH], 6.44 [1 H, dd, *J*(H,H) 11.7, *J*(H,H) 2.9, one H of =CH<sub>2</sub> *cis* to RuCH], 5.88 [1 H, dd, *J*(H,H) 19.6, *J*(H,H) 2.9, one H of =CH<sub>2</sub> *trans* to RuCH], 2.66 [6 H, m; in <sup>1</sup>H{<sup>31</sup>P} sept, *J*(H,H) 7.2, PCHCH<sub>3</sub>], 1.35, 1.11 [18 H each, both dvt, *N* 14.4, *J*(H,H) 7.2, PCHCH<sub>3</sub>]; δ<sub>C</sub> (100.6 MHz) 201.5 [t, *J*(P,C) 11.0, CO], 197.2 [t, *J*(P,C) 9.1, CO], 166.4 [t, *J*(P,C) 12.4, RuCH], 124.2 (s, RuC=C), 23.9 (vt, *N* 21.0, PCHCH<sub>3</sub>), 19.5, 18.3 (both s, PCHCH<sub>3</sub>).

Compound **24a**: NMR (CD<sub>2</sub>Cl<sub>2</sub>): δ<sub>H</sub> (400 MHz) 7.19 [1 H, dd, *J*(H,H) 17.1, *J*(H,H) 7.5, RuCH], 5.54 [1 H, br d, *J*(H,H) 7.5, one H of =CH<sub>2</sub> *cis* to RuCH], 5.08 [1 H, d, *J*(H,H) 17.1, one H of =CH<sub>2</sub> *trans* to RuCH], 2.52-1.25 (72 H, br m, C<sub>6</sub>H<sub>11</sub> and CH<sub>3</sub>CN); δ<sub>C</sub> (100.6 MHz) 206.2 [t, *J*(P,C) 13.7, CO], 153.3 (br s, RuCH), 128.3, 127.3 (both s, CN), 123.4 (s, RuC=C), 34.9 (vt, *N* 18.3, C1 of C<sub>6</sub>H<sub>11</sub>), 29.3, 29.1 (both s, C3,5 of C<sub>6</sub>H<sub>11</sub>), 27.9 (m, C2,6 of C<sub>6</sub>H<sub>11</sub>), 26.4 (s, C4 of C<sub>6</sub>H<sub>11</sub>), 4.3, 3.1 (both s, CH<sub>3</sub>CN).

Compound **24b**: NMR (CD<sub>2</sub>Cl<sub>2</sub>): δ<sub>H</sub> (400 MHz) 7.34-6.86 (21 H, br m, C<sub>6</sub>H<sub>5</sub> and RuCH), 5.41 (1 H, br m, one H of =CH<sub>2</sub> *cis* to RuCH), 5.00 [1 H, d, *J*(H,H) 17.0, one H of =CH<sub>2</sub> *trans* to RuCH], 2.27-1.26 (72 H, br m, C<sub>6</sub>H<sub>11</sub> and CH<sub>3</sub>CN); δ<sub>C</sub> (100.6 MHz) 205.8 (br s, CO), 164.2 [q, *J*(B,C) 49.5, *ipso*-C of BC<sub>6</sub>H<sub>5</sub>], 136.0 (s, CH of BC<sub>6</sub>H<sub>5</sub>), 128.4, 127.3 (both s, CN), 125.7 [q, *J*(B,C) 3.0, CH of BC<sub>6</sub>H<sub>5</sub>], 123.6 (s, RuC=C), 121.8 (s, CH of BC<sub>6</sub>H<sub>5</sub>), 35.1 (vt, *N*

18.3, C1 of C<sub>6</sub>H<sub>11</sub>), 29.5, 29.3 (both s, C<sub>3,5</sub> of C<sub>6</sub>H<sub>11</sub>), 27.9 (vt, *N* 10.2, C<sub>2,6</sub> of C<sub>6</sub>H<sub>11</sub>), 26.8 (s, C<sub>4</sub> of C<sub>6</sub>H<sub>11</sub>), 3.5, 2.9 (both s, CH<sub>3</sub>CN), signal of RuCH not exactly located.

Compound **26**: NMR (CD<sub>2</sub>Cl<sub>2</sub>): δ<sub>H</sub> (200 MHz, 273 K) 8.21-7.24 (20 H, m, C<sub>6</sub>H<sub>5</sub>), 4.64, 4.32, 3.98, 3.77 (2 H each, all s, C<sub>5</sub>H<sub>4</sub>), 1.71-0.82 (33 H, br m, C<sub>6</sub>H<sub>11</sub>), -19.58 (1 H, m, RuH); δ<sub>H</sub> (200 MHz, 203 K) 8.23-6.67 (20 H, m, C<sub>6</sub>H<sub>5</sub>), 5.37, 4.71, 4.12, 3.90, 3.83, 3.80, 3.74, 3.66 (1 H each, all s, C<sub>5</sub>H<sub>4</sub>), 2.17-0.76 (33 H, br m, C<sub>6</sub>H<sub>11</sub>), -19.64 [1 H, dt, *J*(P,H) 43.6, *J*(P,H) 18.0, RuH); δ<sub>C</sub> (100.6 MHz, 273 K) 140.8 [d, *J*(P,C) 44.8, *ipso*-C of C<sub>6</sub>H<sub>5</sub>], 137.3 [d, *J*(P,C) 11.4, C<sub>6</sub>H<sub>5</sub>], 135.1 [d, *J*(P,C) 38.1, *ipso*-C of C<sub>6</sub>H<sub>5</sub>], 132.5 [d, *J*(P,C) 8.6, C<sub>6</sub>H<sub>5</sub>], 129.7, 128.3 (both s, C<sub>6</sub>H<sub>5</sub>), 127.6 [d, *J*(P,C) 8.6, C<sub>6</sub>H<sub>5</sub>], 127.0 [d, *J*(P,C) 9.5, C<sub>6</sub>H<sub>5</sub>], 77.7 [d, *J*(P,C) 11.4, C<sub>5</sub>H<sub>4</sub>], 73.7 [d, *J*(P,C) 5.7, C<sub>5</sub>H<sub>4</sub>], 71.8 [d, *J*(P,C) 4.8, C<sub>5</sub>H<sub>4</sub>], 34.9 [d, *J*(P,C) 14.3, C1 of C<sub>6</sub>H<sub>11</sub>], 29.5 (s, C<sub>3,5</sub> of C<sub>6</sub>H<sub>11</sub>), 27.5 [d, *J*(P,C) 8.6, C<sub>2,6</sub> of C<sub>6</sub>H<sub>11</sub>], 26.5 (s, C<sub>4</sub> of C<sub>6</sub>H<sub>11</sub>).

Compound **27**: NMR (CD<sub>2</sub>Cl<sub>2</sub>): δ<sub>H</sub> (200 MHz, 273 K) 7.38-6.74 (15 H, m, C<sub>6</sub>H<sub>5</sub>), 2.86 (6 H, s, CH<sub>2</sub>), 1.92-1.25 (66 H, br m, C<sub>6</sub>H<sub>11</sub>), -15.40 (1 H, br s, RuH).

Compound **30**: NMR (CD<sub>2</sub>Cl<sub>2</sub>): δ<sub>H</sub> (400 MHz) 2.50 (3 H, br s, CH<sub>3</sub>CN), 2.40-1.18 (66 H, br m, C<sub>6</sub>H<sub>11</sub>), -15.96 (1 H, br s, RuH); δ<sub>C</sub> (100.6 MHz) 129.9 (s, CN), 34.5 (vt, *N* 18.1, C1 of C<sub>6</sub>H<sub>11</sub>), 29.5 (s, C<sub>3,5</sub> of C<sub>6</sub>H<sub>11</sub>), 27.0 (vt, *N* 10.5, C<sub>2,6</sub> of C<sub>6</sub>H<sub>11</sub>), 25.9 (s, C<sub>4</sub> of C<sub>6</sub>H<sub>11</sub>), 3.9 (s, CH<sub>3</sub>CN).

Compound **31**: NMR (CD<sub>2</sub>Cl<sub>2</sub>): δ<sub>H</sub> (200 MHz) 9.63 [1 H, d, *J*(HH) 14.7, RuCH], 6.92 (5 H, m, C<sub>6</sub>H<sub>5</sub>), 5.82 [1 H, d, *J*(HH) 14.7, =CHPh], 2.52 (3 H, s, CH<sub>3</sub>CN), 2.43-1.23 (66 H, br m, C<sub>6</sub>H<sub>11</sub>); δ<sub>C</sub> (50.3 MHz) 150.0 [t, *J*(P,C) 10.2, RuCH], 139.5 (s, *ipso*-C of C<sub>6</sub>H<sub>5</sub>), 132.5 (br s, RuC=C), 128.2 (s, CN), 128.0, 124.3, 122.9 (all s, C<sub>6</sub>H<sub>5</sub>), 33.2 (vt, *N* 14.5, C1 of C<sub>6</sub>H<sub>11</sub>), 29.8,

Supplementary Material (ESI) for Dalton Transactions  
This journal is © The Royal Society of Chemistry 2004

29.6 (both s, C3,5 of C<sub>6</sub>H<sub>11</sub>), 28.3, 27.8 (both m, C2,6 of C<sub>6</sub>H<sub>11</sub>), 26.8 (s, C4 of C<sub>6</sub>H<sub>11</sub>), 5.8 (s, CH<sub>3</sub>CN).
